# Supplementary material for: Are Patients With an International Classification of Diseases, 10th Edition Discharge Diagnosis Code for Sepsis Different in Regard to Demographics and Outcome Variables When Comparing Those With Sepsis Only to Those Also Diagnosed With COVID-19 or Those With a COVID-19 Diagnosis Alone?
Source: PubMed Central journal article supplement — Crit Care Explor. 2023 Aug 25;5(9):e0964. doi: 10.1097/CCE.0000000000000964 (PMC10461943; doi:10.1097/cce.0000000000000964), 2023-08-25
Supplement: cc9-5-e0964-s001.pdf [file cc9-5-e0964-s001.pdf]

**Supplementary eTable 1: ICD-10 Codes for Infection**

| DISCHARGE_DX_CODE | DISCHARGE_DX_DESC                                                                                   |
|-------------------|-----------------------------------------------------------------------------------------------------|
| N39.0             | Urinary tract infection, site not specified                                                         |
| J18.9             | Pneumonia, unspecified organism                                                                     |
| B96.20            | Unspecified Escherichia coli (E. coli) as the cause of diseases classified elsewhere                |
| N30.00            | Acute cystitis without hematuria                                                                    |
| J06.9             | Acute upper respiratory infection, unspecified                                                      |
| J02.9             | Acute pharyngitis, unspecified                                                                      |
| B34.9             | Viral infection, unspecified                                                                        |
| N30.01            | Acute cystitis with hematuria                                                                       |
| B95.62            | Methicillin resistant Staphylococcus aureus infection as the cause of diseases classified elsewhere |
| L02.91            | Cutaneous abscess, unspecified                                                                      |
| L08.9             | Local infection of the skin and subcutaneous tissue, unspecified                                    |
| L03.90            | Cellulitis, unspecified                                                                             |
| L03.119           | Cellulitis of unspecified part of limb                                                              |
| J02.0             | Streptococcal pharyngitis                                                                           |
| J01.90            | Acute sinusitis, unspecified                                                                        |
| J03.90            | Acute tonsillitis, unspecified                                                                      |
| A69.20            | Lyme disease, unspecified                                                                           |
| B96.29            | Other Escherichia coli (E. coli) as the cause of diseases classified elsewhere                      |
| L02.419           | Cutaneous abscess of limb, unspecified                                                              |
| A15.0             | Tuberculosis of lung                                                                                |
| A05.9             | Bacterial foodborne intoxication, unspecified                                                       |
| B97.4             | Respiratory syncytial virus as the cause of diseases classified elsewhere                           |
| A07.1             | Giardiasis (lambliasis)                                                                             |
| A03.9             | Shigellosis, unspecified                                                                            |
| G05.3             | Encephalitis and encephalomyelitis in diseases classified elsewhere                                 |
| A18.01            | Tuberculosis of spine                                                                               |

|        |                                                                |
|--------|----------------------------------------------------------------|
| A19.9  | Miliary tuberculosis, unspecified                              |
| B89    | Unspecified parasitic disease                                  |
| A77.0  | Spotted fever due to <i>Rickettsia rickettsii</i>              |
| A17.0  | Tuberculous meningitis                                         |
| A54.00 | Gonococcal infection of lower genitourinary tract, unspecified |
| A18.02 | Tuberculous arthritis of other joints                          |
| A37.90 | Whooping cough, unspecified species without pneumonia          |
| A15.7  | Primary respiratory tuberculosis                               |
| A15.8  | Other respiratory tuberculosis                                 |

**Supplementary eTable 2: ICD-10 Codes for Acute Organ Dysfunction**

| DISCHARGE_DX_CODE | DISCHARGE_DX_DESC                                                          |
|-------------------|----------------------------------------------------------------------------|
| N17.9             | Acute kidney failure, unspecified                                          |
| E87.2             | Acidosis                                                                   |
| J96.01            | Acute respiratory failure with hypoxia                                     |
| I95.9             | Hypotension, unspecified                                                   |
| R65.21            | Severe sepsis with septic shock                                            |
| N17.0             | Acute kidney failure with tubular necrosis                                 |
| D69.6             | Thrombocytopenia, unspecified                                              |
| N18.6             | End stage renal disease                                                    |
| N18.9             | Chronic kidney disease, unspecified                                        |
| N18.3             | Chronic kidney disease, stage 3 (moderate)                                 |
| F05               | Delirium due to known physiological condition                              |
| G93.41            | Metabolic encephalopathy                                                   |
| D68.9             | Coagulation defect, unspecified                                            |
| J96.02            | Acute respiratory failure with hypercapnia                                 |
| N18.4             | Chronic kidney disease, stage 4 (severe)                                   |
| G93.40            | Encephalopathy, unspecified                                                |
| J80               | Acute respiratory distress syndrome                                        |
| R57.0             | Cardiogenic shock                                                          |
| K72.00            | Acute and subacute hepatic failure without coma                            |
| R06.00            | Dyspnea, unspecified                                                       |
| R57.8             | Other shock                                                                |
| I95.1             | Orthostatic hypotension                                                    |
| G93.49            | Other encephalopathy                                                       |
| J96.00            | Acute respiratory failure, unspecified whether with hypoxia or hypercapnia |
| G93.1             | Anoxic brain damage, not elsewhere classified                              |
| I95.89            | Other hypotension                                                          |
| I46.9             | Cardiac arrest, cause unspecified                                          |

|          |                                                                                   |
|----------|-----------------------------------------------------------------------------------|
| N18.2    | Chronic kidney disease, stage 2 (mild)                                            |
| I46.8    | Cardiac arrest due to other underlying condition                                  |
| K75.81   | Nonalcoholic steatohepatitis (NASH)                                               |
| R40.20   | Unspecified coma                                                                  |
| R57.1    | Hypovolemic shock                                                                 |
| D72.819  | Decreased white blood cell count, unspecified                                     |
| R57.9    | Shock, unspecified                                                                |
| D65      | Disseminated intravascular coagulation (defibrination syndrome)                   |
| D68.8    | Other specified coagulation defects                                               |
| N18.5    | Chronic kidney disease, stage 5                                                   |
| R40.2213 | Coma scale, best verbal response, none, at hospital admission                     |
| G72.81   | Critical illness myopathy                                                         |
| R06.09   | Other forms of dyspnea                                                            |
| D69.3    | Immune thrombocytopenic purpura                                                   |
| R40.4    | Transient alteration of awareness                                                 |
| R06.89   | Other abnormalities of breathing                                                  |
| I46.2    | Cardiac arrest due to underlying cardiac condition                                |
| J96.91   | Respiratory failure, unspecified with hypoxia                                     |
| R40.2214 | Coma scale, best verbal response, none, 24 hours or more after hospital admission |
| R40.2113 | Coma scale, eyes open, never, at hospital admission                               |
| R40.0    | Somnolence                                                                        |
| R40.2212 | Coma scale, best verbal response, none, at arrival to emergency department        |
| G62.81   | Critical illness polyneuropathy                                                   |
| J96.90   | Respiratory failure, unspecified, unspecified whether with hypoxia or hypercapnia |
| D72.810  | Lymphocytopenia                                                                   |
| R40.2112 | Coma scale, eyes open, never, at arrival to emergency department                  |
| R40.2114 | Coma scale, eyes open, never, 24 hours or more after hospital admission           |
| R40.2313 | Coma scale, best motor response, none, at hospital admission                      |
| N18.1    | Chronic kidney disease, stage 1                                                   |
| F06.4    | Anxiety disorder due to known physiological condition                             |

|          |                                                                                                     |
|----------|-----------------------------------------------------------------------------------------------------|
| R40.2343 | Coma scale, best motor response, flexion withdrawal, at hospital admission                          |
| R40.2312 | Coma scale, best motor response, none, at arrival to emergency department                           |
| N17.8    | Other acute kidney failure                                                                          |
| R40.2342 | Coma scale, best motor response, flexion withdrawal, at arrival to emergency department             |
| R06.83   | Snoring                                                                                             |
| J96.92   | Respiratory failure, unspecified with hypercapnia                                                   |
| R40.2123 | Coma scale, eyes open, to pain, at hospital admission                                               |
| R40.2222 | Coma scale, best verbal response, incomprehensible words, at arrival to emergency department        |
| K72.01   | Acute and subacute hepatic failure with coma                                                        |
| I67.83   | Posterior reversible encephalopathy syndrome                                                        |
| K75.89   | Other specified inflammatory liver diseases                                                         |
| R40.2122 | Coma scale, eyes open, to pain, at arrival to emergency department                                  |
| R40.2314 | Coma scale, best motor response, none, 24 hours or more after hospital admission                    |
| R40.2223 | Coma scale, best verbal response, incomprehensible words, at hospital admission                     |
| K76.3    | Infarction of liver                                                                                 |
| R40.2344 | Coma scale, best motor response, flexion withdrawal, 24 hours or more after hospital admission      |
| F06.1    | Catatonic disorder due to known physiological condition                                             |
| R40.2124 | Coma scale, eyes open, to pain, 24 hours or more after hospital admission                           |
| R40.3    | Persistent vegetative state                                                                         |
| K71.9    | Toxic liver disease, unspecified                                                                    |
| K75.9    | Inflammatory liver disease, unspecified                                                             |
| R03.1    | Nonspecific low blood-pressure reading                                                              |
| R09.2    | Respiratory arrest                                                                                  |
| R40.2224 | Coma scale, best verbal response, incomprehensible words, 24 hours or more after hospital admission |
| D72.818  | Other decreased white blood cell count                                                              |
| K71.0    | Toxic liver disease with cholestasis                                                                |
| K71.10   | Toxic liver disease with hepatic necrosis, without coma                                             |
| K75.3    | Granulomatous hepatitis, not elsewhere classified                                                   |
| F06.30   | Mood disorder due to known physiological condition, unspecified                                     |

|          |                                                                                           |
|----------|-------------------------------------------------------------------------------------------|
| R40.2324 | Coma scale, best motor response, extension, 24 hours or more after hospital admission     |
| F06.31   | Mood disorder due to known physiological condition with depressive features               |
| R40.2211 | Coma scale, best verbal response, none, in the field (emt or ambulance)                   |
| K71.3    | Toxic liver disease with chronic persistent hepatitis                                     |
| R40.1    | Stupor                                                                                    |
| R40.2322 | Coma scale, best motor response, extension, at arrival to emergency department            |
| E03.5    | Myxedema coma                                                                             |
| F06.32   | Mood disorder due to known physiological condition with major depressive-like episode     |
| R40.2323 | Coma scale, best motor response, extension, at hospital admission                         |
| R40.2111 | Coma scale, eyes open, never, in the field (emt or ambulance)                             |
| R40.2311 | Coma scale, best motor response, none, in the field (emt or ambulance)                    |
| N17.1    | Acute kidney failure with acute cortical necrosis                                         |
| D69.42   | Congenital and hereditary thrombocytopenia purpura                                        |
| K70.41   | Alcoholic hepatic failure with coma                                                       |
| K71.2    | Toxic liver disease with acute hepatitis                                                  |
| K71.6    | Toxic liver disease with hepatitis, not elsewhere classified                              |
| K71.11   | Toxic liver disease with hepatic necrosis, with coma                                      |
| D69.41   | Evans syndrome                                                                            |
| R40.2221 | Coma scale, best verbal response, incomprehensible words, in the field (emt or ambulance) |
| R40.2321 | Coma scale, best motor response, extension, in the field (emt or ambulance)               |
| K71.8    | Toxic liver disease with other disorders of liver                                         |
| D69.49   | Other primary thrombocytopenia                                                            |
| N17.2    | Acute kidney failure with medullary necrosis                                              |
| N01.9    | Rapidly progressive nephritic syndrome with unspecified morphologic changes               |
| K72.91   | Hepatic failure, unspecified with coma                                                    |
| K72.11   | Chronic hepatic failure with coma                                                         |
| R40.2120 | Coma scale, eyes open, to pain, unspecified time                                          |
| R40.2340 | Coma scale, best motor response, flexion withdrawal, unspecified time                     |
| R40.2121 | Coma scale, eyes open, to pain, in the field (emt or ambulance)                           |

|          |                                                                                      |
|----------|--------------------------------------------------------------------------------------|
| N00.9    | Acute nephritic syndrome with unspecified morphologic changes                        |
| F06.2    | Psychotic disorder with delusions due to known physiological condition               |
| N01.7    | Rapidly progressive nephritic syndrome with diffuse crescentic glomerulonephritis    |
| R40.2210 | Coma scale, best verbal response, none, unspecified time                             |
| R40.2220 | Coma scale, best verbal response, incomprehensible words, unspecified time           |
| F06.34   | Mood disorder due to known physiological condition with mixed features               |
| K71.51   | Toxic liver disease with chronic active hepatitis with ascites                       |
| R40.2341 | Coma scale, best motor response, flexion withdrawal, in the field (emt or ambulance) |
| N00.7    | Acute nephritic syndrome with diffuse crescentic glomerulonephritis                  |
| F06.0    | Psychotic disorder with hallucinations due to known physiological condition          |
| N00.8    | Acute nephritic syndrome with other morphologic changes                              |
| F06.33   | Mood disorder due to known physiological condition with manic features               |
| K71.7    | Toxic liver disease with fibrosis and cirrhosis of liver                             |
| K75.2    | Nonspecific reactive hepatitis                                                       |
| K76.2    | Central hemorrhagic necrosis of liver                                                |
| N01.1    | Rapidly progressive nephritic syndrome with focal and segmental glomerular lesions   |

**Supplemental eTable 3: Charlson Comorbidity Index and Comorbidity Comparison by Patient Type**

| Charlson Comorbidity Measure          | Cohort A:<br>Sepsis Only<br>(N #= 3297) | Cohort B:<br>COVID-19 Only<br>(N = 6945) | Cohort C: Sepsis<br>+ COVID-19<br>(N = 1153) | Compare<br>Cohort A<br>vs. B | Compare<br>Cohort A<br>vs. C | Compare<br>Cohort B<br>vs. C |
|---------------------------------------|-----------------------------------------|------------------------------------------|----------------------------------------------|------------------------------|------------------------------|------------------------------|
|                                       | N (Percent)                             | N (Percent)                              | N (Percent)                                  | P-value                      | P-value                      | P-value                      |
| Myocardial Infarction                 | 515 (15.6%)                             | 512 (7.9%)                               | 165 (14.3%)                                  | <.0001                       | 0.2873                       | <.0001                       |
| Congestive Heart Failure              | 1004 (30.5%)                            | 1162 (17.9%)                             | 275 (23.9%)                                  | <.0001                       | <.0001                       | <.0001                       |
| Peripheral Vascular Disease           | 407 (12.3%)                             | 456 (7.0%)                               | 114 (9.9%)                                   | <.0001                       | 0.0255                       | 0.0007                       |
| Cerebrovascular Disease               | 433 (13.1%)                             | 481 (7.4%)                               | 133 (11.5%)                                  | <.0001                       | 0.161                        | <.0001                       |
| Dementia                              | 422 (12.8%)                             | 727 (11.2%)                              | 181 (15.7%)                                  | 0.0227                       | 0.0133                       | <.0001                       |
| Paraplegia and Hemiplegia             | 217 (6.6%)                              | 109 (1.7%)                               | 25 (2.2%)                                    | <.0001                       | <.0001                       | 0.2485                       |
| Chronic Pulmonary Disease             | 865 (26.2%)                             | 1550 (23.9%)                             | 290 (25.2%)                                  | 0.0129                       | 0.4698                       | 0.3763                       |
| Connective Tissue - Rheumatic Disease | 116 (3.5%)                              | 158 (2.4%)                               | 37 (3.2%)                                    | 0.0023                       | 0.6198                       | 0.1277                       |
| Peptic Ulcer Disease                  | 115 (3.5%)                              | 54 (0.8%)                                | 17 (1.5%)                                    | <.0001                       | 0.0005                       | 0.037                        |
| Mild Liver Disease                    | 420 (12.7%)                             | 388 (6.0%)                               | 89 (7.7%)                                    | <.0001                       | <.0001                       | 0.0258                       |
| Moderate or Severe Liver Disease      | 168 (5.1%)                              | 89 (1.4%)                                | 28 (2.4%)                                    | <.0001                       | 0.0001                       | 0.0073                       |
| Diabetes without Complications        | 969 (29.4%)                             | 1694 (26.2%)                             | 388 (33.7%)                                  | 0.0007                       | 0.0068                       | <.0001                       |
| Diabetes with Complications           | 764 (23.2%)                             | 1044 (16.1%)                             | 250 (21.7%)                                  | <.0001                       | 0.2992                       | <.0001                       |
| Renal Disease                         | 1085 (32.9%)                            | 1494 (23.1%)                             | 377 (32.7%)                                  | <.0001                       | 0.8953                       | <.0001                       |
| Cancer, any                           | 418 (12.7%)                             | 353 (5.5%)                               | 70 (6.1%)                                    | <.0001                       | <.0001                       | 0.3979                       |
| Metastatic Carcinoma                  | 219 (6.6%)                              | 123 (1.9%)                               | 23 (2.0%)                                    | <.0001                       | <.0001                       | 0.8285                       |
| AIDS/HIV*                             | 33 (1.0%)                               | 19 (0.3%)                                | 2 (0.2%)                                     | <.0001                       | 0.0062                       | 0.4737                       |
| CCI^ Index, N (mean)                  | 8170 (2.5)                              | 10413 (1.6)                              | 2464 (2.1)                                   | <.0001                       | <.0001                       | <.0001                       |

#N: Number of patients

\*HIV/AIDS: Human Immunodeficiency Virus/ Acquired Immunodeficiency Deficiency Syndrome.

^CCI: Charlson Comorbidity Index, which measures the number of comorbidity conditions that a patient has.

Note: Student's t-test was used for CCI Index. Chi-square test was used all other measures



Supplementary eTable 4: All Lab Result Comparison

| Lab Measure     | Cohort A:<br>Sepsis Only<br>(N = 3297) | Cohort B:<br>COVID Only<br>(N = 6945) | Cohort C:<br>Sepsis and COVID<br>(N = 1153) | Compare<br>Cohort A vs. B | Compare<br>Cohort A vs. C | Compare<br>Cohort B vs. C |
|-----------------|----------------------------------------|---------------------------------------|---------------------------------------------|---------------------------|---------------------------|---------------------------|
|                 | Median (IQR)                           | Median (IQR)                          | Median (IQR)                                | P-value                   | P-value                   | P-value                   |
| Sodium          | 138 (135.3, 141.0)                     | 137.8 (135.7, 139.8)                  | 138.8 (136.3, 142.0)                        | <.0001                    | <.0001                    | <.0001                    |
| Potassium       | 4 (3.7, 4.3)                           | 4 (3.7, 4.3)                          | 4.1 (3.8, 4.5)                              | 0.1636                    | <.0001                    | <.0001                    |
| Chloride        | 103.4 (100.0, 107.0)                   | 102.7 (100.0, 105.5)                  | 103.6 (100.9, 107.7)                        | <.0001                    | 0.0005                    | <.0001                    |
| CO <sub>2</sub> | 22.8 (20.3, 25.0)                      | 23.7 (21.9, 25.6)                     | 22.9 (20.8, 25.3)                           | <.0001                    | 0.0714                    | <.0001                    |
| Anion Gap       | 11.2 (9.4, 13.8)                       | 11.3 (9.8, 13.2)                      | 11.5 (10.0, 13.8)                           | <.0001                    | 0.4307                    | <.0001                    |
| BUN             | 26.4 (16.7, 42.9)                      | 19 (13.0, 29.0)                       | 32.1 (20.2, 49.7)                           | <.0001                    | <.0001                    | <.0001                    |
| Creatinine      | 1.2 (0.8, 2.0)                         | 0.9 (0.7, 1.3)                        | 1.2 (0.9, 2.0)                              | <.0001                    | 0.4572                    | <.0001                    |
| eGFR_nam        | 51.5 (31.6, 59.9)                      | 59.9 (50.0, 60.0)                     | 52 (33.4, 59.9)                             | <.0001                    | 0.343                     | <.0001                    |
| eGFR_am         | 55.8 (37.7, 60.0)                      | 60 (56.0, 60.0)                       | 56.3 (39.3, 60.0)                           | <.0001                    | 0.3764                    | <.0001                    |
| Glucose         | 127.4 (108.5, 164.0)                   | 124.3 (105.8, 162.0)                  | 151.3 (121.0, 196.5)                        | 0.0382                    | <.0001                    | <.0001                    |
| Calcium         | 8.4 (8.0, 8.8)                         | 8.7 (8.3, 9.0)                        | 8.4 (8.1, 8.8)                              | <.0001                    | 0.8554                    | <.0001                    |
| Albumin         | 3 (2.5, 3.4)                           | 3.4 (3.1, 3.7)                        | 3.1 (2.7, 3.4)                              | <.0001                    | 0.8973                    | <.0001                    |
| WBC             | 11.9 (8.7, 15.7)                       | 7.2 (5.4, 9.7)                        | 10.1 (7.5, 14.1)                            | <.0001                    | <.0001                    | <.0001                    |
| HGB             | 9.7 (8.4, 11.5)                        | 12.1 (10.5, 13.4)                     | 11.3 (9.3, 12.9)                            | <.0001                    | <.0001                    | <.0001                    |
| HCT             | 30.3 (26.5, 35.4)                      | 36.8 (32.2, 40.3)                     | 34.6 (29.2, 39.3)                           | <.0001                    | <.0001                    | <.0001                    |
| Platelet        | 221 (149.8, 305.8)                     | 226.7 (172.5, 293.0)                  | 223.6 (163.0, 288.5)                        | 0.1058                    | 0.7297                    | 0.1047                    |
| Rel_Bands       | 7 (3.0, 13.2)                          | 3.5 (2.0, 7.0)                        | 5.8 (2.9, 12.0)                             | <.0001                    | 0.0004                    | <.0001                    |
| Bilirubin       | 0.8 (0.5, 1.2)                         | 0.6 (0.4, 0.8)                        | 0.7 (0.5, 1.0)                              | <.0001                    | <.0001                    | <.0001                    |
| Lactate         | 2.2 (1.6, 3.2)                         | 1.5 (1.2, 1.9)                        | 1.9 (1.5, 2.9)                              | <.0001                    | 0.0007                    | <.0001                    |
| CRP             | 12 (5.9, 19.7)                         | 5.1 (2.2, 9.2)                        | 9.4 (5.5, 15.4)                             | <.0001                    | 0.0125                    | <.0001                    |
| D-Dimer         | 990 (12.4, 3308.0)                     | 192.5 (1.5, 490.5)                    | 200.3 (2.3, 1139.3)                         | <.0001                    | <.0001                    | <.0001                    |
| INR             | 1.3 (1.2, 1.6)                         | 1.2 (1.1, 1.3)                        | 1.2 (1.1, 1.4)                              | <.0001                    | <.0001                    | <.0001                    |
| CPK             | 103 (43.0, 346.5)                      | 111 (56.0, 256.0)                     | 184.4 (67.2, 441.0)                         | <.0001                    | 0.0047                    | 0.8916                    |
| Ferritin        | 396 (172.0, 912.0)                     | 447.9 (202.0, 910.5)                  | 730 (335.0, 1482.0)                         | 0.0002                    | 0.8552                    | <.0001                    |
| Troponin_T_HS   | 56 (25.7, 130.0)                       | 18.5 (9.5, 41.0)                      | 34.2 (15.0, 85.0)                           | <.0001                    | 0.1665                    | <.0001                    |
| pH              | 7.4 (7.3, 7.4)                         | 7.4 (7.4, 7.5)                        | 7.4 (7.3, 7.4)                              | <.0001                    | 0.0007                    | <.0001                    |
| Bicarb          | 21.5 (18.0, 25.1)                      | 24.3 (21.5, 28.0)                     | 23.8 (20.7, 27.5)                           | <.0001                    | <.0001                    | 0.0261                    |
| Base_Excess     | 1 (-3.9, 3.8)                          | 1.6 (-1.1, 4.4)                       | 1.2 (-2.4, 4.3)                             | <.0001                    | 0.0254                    | 0.0038                    |
| Base_Deficit    | 5.4 (2.9, 9.1)                         | 3 (1.6, 5.5)                          | 4 (2.3, 6.0)                                | <.0001                    | <.0001                    | 0.0141                    |
| Magnesium       | 1.7 (1.5, 1.9)                         | 1.7 (1.6, 1.8)                        | 1.8 (1.6, 2.0)                              | 0.0461                    | <.0001                    | <.0001                    |
| Bilirubin_I     | 45.5 (18.0, 123.3)                     | 15 (7.3, 35.0)                        | 32.3 (14.0, 84.5)                           | <.0001                    | 0.0652                    | <.0001                    |
| Bilirubin_D     | 0.2 (0.2, 0.5)                         | 0.2 (0.2, 0.2)                        | 0.2 (0.2, 0.4)                              | <.0001                    | <.0001                    | <.0001                    |
| AST             | 33.5 (21.2, 66.0)                      | 32 (22.3, 48.0)                       | 44 (30.8, 71.3)                             | <.0001                    | 0.8107                    | <.0001                    |
| ALT             | 26 (16.0, 51.0)                        | 26.2 (17.0, 44.8)                     | 36 (22.4, 63.5)                             | <.0001                    | 0.4758                    | <.0001                    |
| ALP             | 98.7 (73.0, 147.1)                     | 71.3 (56.5, 94.1)                     | 77.4 (61.0, 114.8)                          | <.0001                    | <.0001                    | <.0001                    |
| Protein         | 6.3 (5.7, 7.1)                         | 6.7 (6.2, 7.2)                        | 6.4 (5.9, 6.9)                              | <.0001                    | 0.3863                    | <.0001                    |
| LDH             | 262 (193.5, 415.0)                     | 284.8 (214.0, 384.0)                  | 381.9 (275.0, 533.4)                        | <.0001                    | 0.4132                    | <.0001                    |
| RBC             | 3.4 (2.9, 4.0)                         | 4.2 (3.6, 4.6)                        | 3.9 (3.2, 4.5)                              | <.0001                    | <.0001                    | <.0001                    |

|                 |                     |                     |                   |        |        |        |
|-----------------|---------------------|---------------------|-------------------|--------|--------|--------|
| TSH             | 2 (1.0, 3.8)        | 1.3 (0.6, 2.4)      | 1.3 (0.6, 2.6)    | <.0001 | 0.0399 | 0.1548 |
| PT              | 15.5 (14.0, 18.0)   | 14 (13.0, 15.2)     | 14.8 (13.7, 16.8) | <.0001 | <.0001 | <.0001 |
| PTT             | 34.5 (30.0, 43.9)   | 32.5 (29.5, 37.2)   | 35.4 (31.0, 46.0) | <.0001 | 0.0249 | <.0001 |
| Phosphate       | 3.3 (2.7, 4.0)      | 3.3 (2.8, 3.8)      | 3.5 (2.9, 4.2)    | <.0001 | <.0001 | <.0001 |
| Lipase          | 27 (19.0, 46.0)     | 34 (24.0, 51.0)     | 33 (22.0, 50.0)   | 0.02   | 0.0272 | 0.2526 |
| FIBRINOGEN      | 408.3 (255.5,598.3) | 498.3 (392.5,598.5) | 532 (411.3,600.0) | <.0001 | <.0001 | <.0001 |
| Amylase         | 51 (29.0, 131.2)    | 67.5 (47.5, 96.5)   | 51 (30.0, 87.0)   | 0.3137 | 0.2665 | 0.3149 |
| PO2             | 81 (44.0, 118.3)    | 49.3 (30.5, 78.0)   | 78.8 (59.0, 98.3) | <.0001 | <.0001 | <.0001 |
| PCO2            | 36 (24.5, 44.0)     | 14 (0.1, 29.0)      | 27.6 (15.2, 40.0) | <.0001 | <.0001 | <.0001 |
| O2_SAT          | 92.8 (77.3, 97.0)   | 86.4 (61.0, 95.0)   | 92.9 (86.5, 95.8) | <.0001 | 0.0008 | <.0001 |
| Lymphocytes     | 1.1 (0.7, 1.5)      | 1 (0.7, 1.4)        | 0.9 (0.6, 1.3)    | 0.0581 | 0.4044 | 0.8564 |
| IG              | 0.1 (0.1, 0.3)      | 0.1 (0.0, 0.1)      | 0.1 (0.1, 0.3)    | <.0001 | 0.7087 | <.0001 |
| Abs_IG          | 1 (0.6, 2.0)        | 0.7 (0.4, 1.3)      | 1.2 (0.8, 2.2)    | <.0001 | 0.0825 | <.0001 |
| Abs_Neutrophils | 9.2 (6.5, 12.3)     | 5.2 (3.6, 7.4)      | 7.9 (5.6, 11.0)   | <.0001 | <.0001 | <.0001 |
| Rel_Neutrophils | 79.5 (73.1, 85.0)   | 73.9 (65.5, 81.0)   | 80.8 (73.9, 86.8) | <.0001 | <.0001 | <.0001 |
| Seg_Neutrophils | 75.7 (63.8, 83.0)   | 73.5 (61.2, 82.0)   | 77.2 (66.0, 84.0) | 0.0423 | 0.0042 | <.0001 |
| Abs_Bands       | 1.1 (0.5, 2.1)      | 0.3 (0.1, 0.6)      | 0.7 (0.3, 1.6)    | <.0001 | <.0001 | <.0001 |
| Urine_Gravity   | 1 (1.0, 1.0)        | 1 (1.0, 1.0)        | 1 (1.0, 1.0)      | 0.726  | 0.0001 | <.0001 |
| hCG             | 3 (0.5, 3.0)        | 3 (1.5, 5.0)        | 3 (0.5, 3.0)      | 0.1247 | 0.9206 | 0.4225 |
| Ammonia         | 34 (24.0, 52.0)     | 28.8 (18.0, 45.0)   | 34 (23.0, 47.0)   | 0.0002 | 0.5535 | 0.0186 |

Note: T-test was performed on each lab measure between two cohorts. Their respective P-values are shown here.

**Supplementary eTable 5: Multivariable Analysis of Factors for Predicting Mortality**

| Measure                                 | Cohort A:<br>Sepsis only |         | Cohort B:<br>COVID-19 only |         | Cohort C:<br>Sepsis + COVID-19 |         |
|-----------------------------------------|--------------------------|---------|----------------------------|---------|--------------------------------|---------|
|                                         | Odds Ratio               | P-value | Odds Ratio                 | P-value | Odds Ratio                     | P-value |
| <b>Gender: Female</b>                   |                          |         | 0.8                        | 0.015   |                                |         |
| <b>Marital Status:</b>                  |                          |         |                            |         |                                |         |
| Married                                 | 0.4                      | <.0001  | 0.8                        | 0.0319  |                                |         |
| Single                                  | 0.5                      | <.0001  |                            |         |                                |         |
| Widowed                                 | 0.4                      | <.0001  | 0.6                        | 0.0017  |                                |         |
| Divorced                                | 0.4                      | <.0001  |                            |         |                                |         |
| Unknown                                 |                          |         |                            |         | 2.0                            | 0.0259  |
| <b>Race:</b>                            |                          |         |                            |         |                                |         |
| African American                        |                          |         | 0.7                        | 0.016   | 0.7                            | 0.0426  |
| <b>Advanced Directive: Yes</b>          |                          |         | 1.7                        | 0.0012  |                                |         |
| <b>Age (Years):</b>                     |                          |         |                            |         |                                |         |
| Age in 40 - 49                          | 0.7                      | 0.0312  |                            |         | 3.8                            | 0.0161  |
| Age in 50 - 59                          |                          |         | 2.4                        | 0.0049  | 6.8                            | 0.0002  |
| Age in 60 - 69                          |                          |         | 3.6                        | <.0001  | 10.0                           | <.0001  |
| Age in 70 - 79                          |                          |         | 6.0                        | <.0001  | 15.2                           | <.0001  |
| Age in 80 - 89                          |                          |         | 10.8                       | <.0001  | 17.3                           | <.0001  |
| Age at 90 or greater                    |                          |         | 20.0                       | <.0001  | 23.9                           | <.0001  |
| <b>Payment Type:</b>                    |                          |         |                            |         |                                |         |
| Medicare Managed Care                   | 0.7                      | 0.0052  | 1.4                        | 0.005   | 0.6                            | 0.0044  |
| Self                                    | 2.1                      | 0.0386  |                            |         |                                |         |
| <b>Clinical Variables at Admission:</b> |                          |         |                            |         |                                |         |
| 25 < Admission BMI < 30                 | 0.7                      | 0.0065  |                            |         |                                |         |
| 30 <= Admission BMI < 35                | 0.7                      | 0.0211  |                            |         |                                |         |
| Admission BMI >= 35                     | 0.8                      | 0.0487  |                            |         | 1.7                            | 0.0018  |
| 120<=Admission Systolic BP<130          | 0.7                      | 0.0062  |                            |         |                                |         |
| Admission Systolic BP >= 130            | 0.7                      | <.0001  | 0.6                        | <.0001  |                                |         |
| <b>Comorbidity Condition:</b>           |                          |         |                            |         |                                |         |
| Myocardial Infarction                   | 1.4                      | 0.0016  | 2.2                        | <.0001  |                                |         |
| Congestive Heart Failure                | 1.3                      | 0.003   |                            |         | 1.7                            | 0.0005  |
| Peripheral Vascular Disease             | 1.8                      | <.0001  |                            |         |                                |         |
| Cerebrovascular Disease                 | 1.6                      | 0.0001  | 1.6                        | 0.0023  |                                |         |
| Chronic Pulmonary Disease               | 1.4                      | 0.0022  |                            |         |                                |         |
| Mild Liver Disease                      | 1.7                      | 0.0004  |                            |         |                                |         |
| Diabetes without Complications          |                          |         | 1.4                        | 0.002   |                                |         |
| Paraplegia and Hemiplegia               | 1.4                      | 0.038   |                            |         | 2.4                            | 0.0451  |
| Renal Disease                           | 1.4                      | 0.0013  | 1.5                        | 0.0005  | 1.4                            | 0.0272  |
| Cancer                                  | 1.8                      | <.0001  |                            |         |                                |         |
| Moderate or Severe Liver Disease        | 2.9                      | <.0001  | 3.4                        | 0.0004  | 6.0                            | 0.0002  |
| Metastatic Carcinoma                    |                          |         | 2.5                        | 0.0009  | 3.8                            | 0.0064  |
| <b>Outcome Prevalence: Mortality</b>    | 22.3%                    |         | 6.4%                       |         | 39.2%                          |         |
| <b>Sample Size</b>                      | N = 3297                 |         | N = 6945                   |         | N = 1153                       |         |
| <b>Model C-statistics</b>               | 0.697                    |         | 0.785                      |         | 0.698                          |         |



Supplementary eTable 6: Multivariable Analysis of Factors for Predicting Discharge to Home

| Measure                                      | Cohort A:<br>Sepsis only |         | Cohort B:<br>COVID-19 only |         | Cohort C:<br>Sepsis + COVID-19 |         |
|----------------------------------------------|--------------------------|---------|----------------------------|---------|--------------------------------|---------|
|                                              | Odds Ratio               | P-value | Odds Ratio                 | P-value | Odds Ratio                     | P-value |
| <b>Marital Status:</b>                       |                          |         |                            |         |                                |         |
| Married                                      | 1.63                     | <.0001  | 1.61                       | <.0001  | 1.73                           | 0.0011  |
| Widowed                                      | 1.66                     | 0.0049  |                            |         |                                |         |
| Unknown                                      | 0.31                     | 0.0023  |                            |         |                                |         |
| <b>Race:</b>                                 |                          |         |                            |         |                                |         |
| African American                             |                          |         | 1.19                       | 0.0159  | 1.54                           | 0.0195  |
| Hispanic                                     |                          |         | 1.50                       | 0.0037  |                                |         |
| Asian                                        | 2.21                     | 0.0006  | 1.81                       | <.0001  | 1.80                           | 0.0355  |
| Advanced Directive - Yes                     | 0.24                     | <.0001  | 0.48                       | <.0001  |                                |         |
| <b>Age (Years):</b>                          |                          |         |                            |         |                                |         |
| Age in 40 - 49                               |                          |         | 0.72                       | 0.0205  | 0.39                           | 0.0086  |
| Age in 50 - 59                               | 0.56                     | 0.0003  | 0.58                       | <.0001  | 0.30                           | 0.0003  |
| Age in 60 - 69                               | 0.53                     | <.0001  | 0.36                       | <.0001  | 0.16                           | <.0001  |
| Age in 70 - 79                               | 0.36                     | <.0001  | 0.21                       | <.0001  | 0.07                           | <.0001  |
| Age in 80 - 89                               | 0.24                     | <.0001  | 0.11                       | <.0001  | 0.05                           | <.0001  |
| Age at 90 or greater                         | 0.16                     | <.0001  | 0.09                       | <.0001  | 0.04                           | <.0001  |
| <b>Payment Type:</b>                         |                          |         |                            |         |                                |         |
| Medicare Managed Care                        |                          |         |                            |         | 1.65                           | 0.026   |
| Medicaid                                     |                          |         | 1.68                       | 0.0111  |                                |         |
| Self                                         |                          |         | 4.42                       | 0.0004  |                                |         |
| Commercial                                   |                          |         | 2.90                       | 0.0157  |                                |         |
| <b>Clinical Variables at Admission:</b>      |                          |         |                            |         |                                |         |
| 25 < Admission BMI <sup>A</sup> < 30         | 1.31                     | 0.0367  | 1.38                       | <.0001  | 1.58                           | 0.0200  |
| 30 <= Admission BMI < 35                     | 1.44                     | 0.0135  | 1.54                       | <.0001  | 1.61                           | 0.0261  |
| Admission BMI >= 35                          | 1.42                     | 0.0126  |                            |         |                                |         |
| 120 <= Admission SBP <sup>B</sup> < 130 mmHg | 1.89                     | <.0001  |                            |         |                                |         |
| Admission SBP >= 130 mmHg                    | 1.48                     | 0.0003  | 1.31                       | <.0001  |                                |         |
| 90 <= Admission DBP <sup>C</sup> < 120 mmHg  |                          |         | 1.31                       | 0.0038  |                                |         |
| <b>Comorbidity Condition:</b>                |                          |         |                            |         |                                |         |
| Congestive Heart Failure                     | 0.46                     | <.0001  | 0.58                       | <.0001  | 0.47                           | 0.0017  |
| Cerebrovascular Disease                      | 0.23                     | <.0001  | 0.30                       | <.0001  | 0.24                           | 0.0007  |
| Dementia                                     | 0.45                     | 0.001   | 0.29                       | <.0001  | 0.26                           | 0.0029  |
| Peptic Ulcer Disease                         | 0.25                     | 0.0015  | 0.32                       | 0.0004  |                                |         |
| Diabetes without Complications               |                          |         | 0.77                       | 0.0002  | 0.66                           | 0.019   |
| Diabetes with Complications                  | 0.68                     | 0.0029  | 0.72                       | 0.0011  |                                |         |
| Paraplegia and Hemiplegia                    | 0.18                     | <.0001  | 0.14                       | <.0001  |                                |         |
| Renal Disease                                |                          |         | 0.66                       | <.0001  | 0.56                           | 0.0045  |
| Moderate or Severe Liver Disease             | 0.25                     | <.0001  | 0.45                       | 0.0008  |                                |         |
| Metastatic Carcinoma                         | 0.40                     | 0.0002  | 0.54                       | 0.0039  |                                |         |
| AIDS/HIV <sup>D</sup>                        | 2.50                     | 0.0211  |                            |         |                                |         |
| <b>Outcome Prevalence: Discharge to Home</b> | 18.4%                    |         | 50.6%                      |         | 22.0%                          |         |
| <b>Sample Size</b>                           | N = 3297                 |         | N = 6945                   |         | N = 1153                       |         |
| <b>Model C-statistics</b>                    | 0.784                    |         | 0.821                      |         | 0.82                           |         |

<sup>a</sup>BMI: Body Mass Index

<sup>b</sup>SBP: Systolic Blood Pressure

<sup>c</sup>DBP: Diastolic Blood Pressure

<sup>d</sup>HIV/AIDS: Human Immunodeficiency Virus/Acquired Immunodeficiency Syndrome
